# Supplementary material for: Dietary Emulsifier–Induced Low-Grade Inflammation Promotes Colon Carcinogenesis
Source: Oxford University Press journal article supplement (doi:10.1158/0008-5472.can-16-1359), 2016-11-07
Supplement: 00085472can161359-sup-166192_2_supp_3716367_7fkhk7.docx [file 00085472can161359-sup-166192_2_supp_3716367_7fkhk7.docx]

**Table S1.** Oligonucleotides used.

| **Primer name** | **Oligonucleotide sequence (5’-3’)** |
| --- | --- |
| 36B4-F  36B4-R  IL6-F  IL6-R  CXCL1-F  CXCL1-R  CXCL2-F  CXCL2-R  IL22-F  IL22-R  TNFa-F  TNFa-R  CyclinD1-F  CyclinD1-R  CyclinD2-F  CyclinD2-R  Ki67-F  Ki67-R  Bcl2-F  Bcl2-R  BAD-F  BAD-R  VEGFA-F  VEGFA-R  CTNNBL-F  CTNNBL-R  LEF1-F  LEF1-R  16S-F  16F-R  Gammaproteobacteria-F  Gammaproteobacteria-R  Enterobacteriaceae-F  Enterobacteriaceae-R  *Escherichia coli*-F  *Escherichia coli*-R  ClbB-F  ClbB-R | TCCAGGCTTTGGGCATCA  CTTTATTCAGCTGCACATCACTCAGA  ACAAGTCGGAGGCTTAATTACACAT  TTGCCATTGCACAACTCTTTTC  TTGTGCGAAAAGAAGTGCAG  TACAAACACAGCCTCCCACA  CACTCTCAAGGGCGGTCAAA  TACGATCCAGGCTTCCCGGGT  GTGCTCAACTTCACCCTGGA  TGGATGTTCTGGTCGTCACC  AGGCTGCCCCGACTACGT  GACTTTCTCCTGGTATGAGATAGCAAA  TCTCCTGCTACCGCACAAC  TTCCTCCACTTCCCCCTC  TCCCGCAGTGTTCCTATTTC  CTGGGGCTTCACAGAGTTGT  TGTCTCAAAGACATTGCCCA  TCCATGTCTCAGCCTCACAG  GTACCTGAACCGGCATCTG  GGGGCCATATAGTTCCACAA  GGCTTGAGGAAGTCCGATCC  TCCATGATGACTGTTGGTGGC  AACGATGAAGCCCTGGAGTG  GCTGGCTTTGGTGAGGTTTG  ATCATTCTGGCCAGTGGTGG  AAGTCGCTGACTTGGGTCTG  GACGGAGGCCTGTACAACAA  GTCGCTGTAGGTGATGAGGG  GTGSTGCAYGGYTGTCGTCA  ACGTCRTCCMCACCTTCCTC  TCGTCAGCTCGTGTYGTGA  CGTAAGGGCCATGATG  CAGGTCGTCACGGTAACAAG  GTGGTTCAGTTTCAGCATGTAC  CATGCCGCGTGTATGAAGAA  CGGGTAACGTCAATGAGCAAA  GCGCATCCTCAAGAGTAAATA  GCGCTCTATGCTCATCAACC |
